# Supplementary material for: Salinity and hydraulic retention time induce membrane phospholipid acyl chain remodeling in Halanaerobium congolense WG10 and mixed cultures from hydraulically fractured shale wells
Source: Frontiers journal article supplement (doi:10.3389/fmicb.2022.1023575), 2022-11-10
Supplement: Data_Sheet_2.PDF [file Data_Sheet_2.PDF]

### Supplementary Material

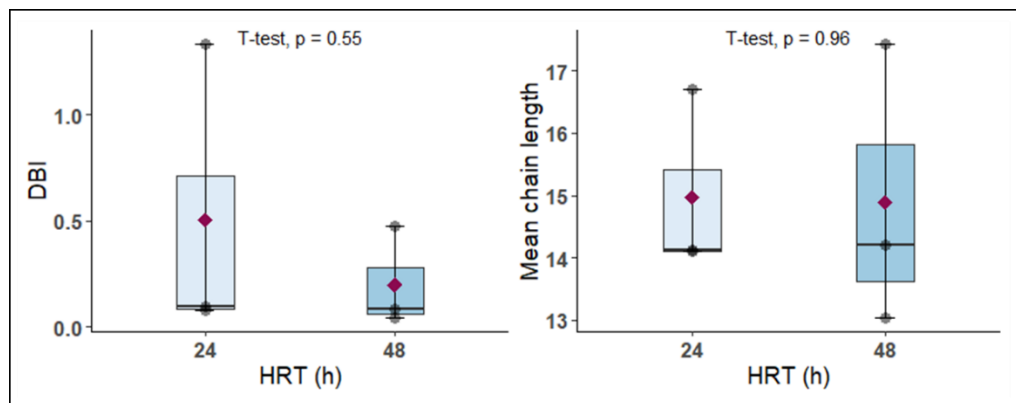

**Figure S1.** Mean chain length and double bond index (DBI) of membrane phospholipids in the mixed cultures of persistent shale taxa did not vary significantly with hydraulic retention time (HRT).

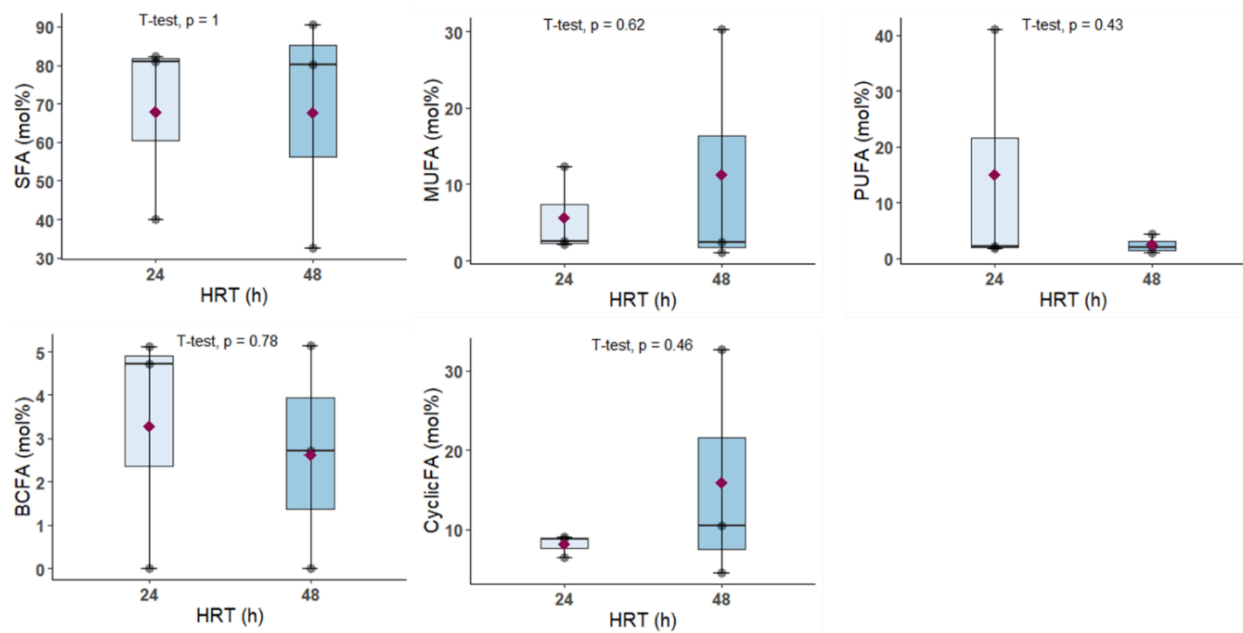

**Figure S2.** Membrane phospholipid fatty acid classes in the mixed cultures of persistent shale taxa did not vary significantly with hydraulic retention time (HRT).
